# Supplementary material for: The rate of de novo structural variation is increased in in vitro–produced offspring and preferentially affects the paternal genome
Source: HighWire-hosted journal article supplement (doi:10.1101/gr.277884.123), 2023-09-01
Supplement: Supplemental_Tables_S1_S3.xlsx [file Supplemental_Tables_S1_S3.xlsx]

## Sheet: ST1
Supplemental Table S1. Comparison of de novo structural mutation rates
Author	Title of the study	WGS data spec	Data structure	Detection	Resolution	Max length	SV type	Cohort information	No_dnSV	No_trios	Number of dnSV detected per trio	Paternal bias
Lee et al (2023)	The rate of de novo structural variation is increased in in vitro produced offspring and preferentially affects the paternal genome	WGS (sperm of blood; 26X) Insert length: 550bp Read length: 100bp	Damona predigree: multi-generation bovine pedigrees with multiple half-sibs and grand-offspring	Smoove	50bp	1.2Mb	CNV, INV, complex	Healthy cattle	19	127	6.68421	10:1 paternal bias
Belyeu et al (2021)	De novo structural mutation rates and gamete-of-origin biases revealed through genome sequencing of 2,396 families DOI: 10.1101/2020.10.06.329011	Seqeuncing data information is not provided in the manuscript	2 generation pedgirees 2,363 ASD trios 2,372 healthy trios Healthy trios include 434 CEPH trios (3 generation pedigrees )	Smoove GATK-SV (composite calling based on 7 callers)	50bp	13 Mb	CNV, MEI, complex	ASD + Healthy	865	4735	5.47399	2.5:1 paternal bias
					50bp		CNV, INV	ASD + Healthy	733	4735	6.45975	1.1:1 paternal bias
					50bp		CNV, MEI, complex	ASD	486	2363	4.86214	2.9:1 paternal bias
					50bp		CNV, INV	ASD	379	2363	6.23483	1.9:1 paternal bias
					50bp		CNV, MEI, complex	Healthy	379	2372	6.25858	2.9:1 paternal bias
					50bp		CNV, INV	Healthy	289	2372	8.20761	1.9:1 paternal bias
					50bp		CNV, MEI, complex	CEPH (Healthy)	62	434	7
					50bp		CNV, INV	CEPH (Healthy)	52	434	8.34615
Brandler et al (2018)	Paternally inherited cis-regulatory structural variants are associated with autism DOI: 10.1126/science.aan2261	WGS (blood, 42.6X) REACH cohort (Read length: 150bp; 50X) SSC1 cohort (Read length: 150bp Insert sizes: 348-420bp; 39-50X)	REACH cohort 112 ASD trios 362 healthy trios SSC1 cohort 517 Autism quads (parents, an autism proband, and a healthy sibling) 2 generation pedigrees	ForestSV, Lumpy, Manta, and Mobster	43bp	17Mb	CNV, INV, MEI, complex	ASD + Healthy	175	1510	8.62857
					50bp		CNV, INV	ASD + Healthy	135	1510	11.1852
					43bp	17Mb	CNV, INV, MEI, complex	ASD	104	880	8.46154
					50bp		CNV, INV	ASD	80	880	11
					43bp	17Mb	CNV, INV, MEI, complex	Healthy	67	630	9.40299
					50bp	1.6Mb	CNV, INV	Healthy	48	630	13.125
Werling et al (2018)	An analytical framework for whole-genome sequence association studies and its implications for autism spectrum disorder DOI: 10.1038/s41588-018-0107-y	WGS (blood; 37.8X) Insert length: 423bp Read length: 150bp	SFARI consortium 519 Autism quads (parents, an autism proband, and a healthy sibling) 2 generation pedigrees	GATK-SV (composite calling based on 7 callers)	50bp	Aneuploidy	CNV, MEI, complex	ASD + Healthy	171	1038	6.07018
					50bp		CNV	ASD + Healthy	127	1038	8.17323
					50bp	Aneuploidy	CNV, MEI, complex	ASD	87	519	5.96552
					50bp		CNV	ASD	65	519	7.98462
					50bp	Aneuploidy	CNV, MEI, complex	Healthy	84	519	6.17857
					50bp		CNV	Healthy	63	519	8.2381
Turner et al (2017)	Genomic Patterns of De Novo Mutation in Simplex Autism DOI: 10.1016/j.cell.2017.08.047	WGS (blood; 34.8X) Insert length: 423bp	SFARI consortium 476 Autism quads (parents, an autism proband, and a healthy sibling) 2 generation pedigrees	dCGH, GenomeSTRiP, Lumpy, VariationHunter, Wham, and Whamg	201bp	242 kb	CNV	ASD + Healthy	88	952	10.8182
					201bp	242 kb	CNV	ASD	47	476	10.1277
					201bp	242 kb	CNV	Healthy	41	476	11.6098
Kloosterman et al (2015)	Characteristics of de novo structural changes in the human genome DOI: 10.1101/gr.185041.114.19	WGS (blood, 14X) Insert length: 500bp Read length: 90bp	258 healthy trios 2 generation pedigrees from GoNL project	11 callers	20bp		CNV, MEI, complex	Healthy	41	258	6.29268
					50bp	327 kb	CNV	Healthy	29	258	8.89655	3.2:1 paternal bias

## Sheet: ST2
Supplementary Table S2. Damona sample information
OFFSPRING									SIRE										DAM										De Novo Structural Variants
Proband	Birth Year	Birth Month	Birth Day	Birth date	Gender Prob	Sample Type Prob	Repro Prob	Sequ Depth Prob	Sire	Birth Year	Birth Month	Birth Day	Birth date bull	Age Sire in months	Age Sire in years	Sample Type Sire	Repro Sire	Sequ Depth Sire	Dam	Birth Year	Birth Month	Birth Day	Birth date dam	Age Dam in months	Age Dam in years	Sample Type Dam	Repro Dam	Sequ Depth Dam	dnSV	Nunber of dnSV detect	Nr assigned to Proband	Nr assigned to Sire	Nr assigned to Dam	Note
Damona-GIGA-ULiège-614	2009	4	12	2009-04-12	1	Blood	AI	24.9129	Damona-GIGA-ULiège-739	2000	1	3	2000-01-03	112.633	9.38611	Sperm	AI	27.7297	Damona-GIGA-ULiège-378	2004	6	21	2004-06-21	58.2667	4.85556	Blood	AI	23.711	found	1	0.5	0.5	0	A-1
Damona-GIGA-ULiège-159	1999	4	25	1999-04-25	2	Blood	IVF	23.9569	Damona-GIGA-ULiège-701	1993	8	8	1993-08-08	69.2667	5.77222	Sperm	AI	26.158	Damona-GIGA-ULiège-74	1996	11	11	1996-11-11	29.5667	2.46389	Blood	MOET	24.4493	found	2	0.5(1)	1.5(1)	0	A-2, NM-3
Damona-GIGA-ULiège-37	1995	11	22	1995-11-22	2	Blood	IVF	27.3993	Damona-GIGA-ULiège-502	1989	8	26	1989-08-26	75.7	6.30833	Sperm	AI	24.9637	Damona-GIGA-ULiège-709	1993	9	28	1993-09-28	25.9	2.15833	Blood	AI	25.2423	found	1	0.5	0.5	0	A-3
Damona-GIGA-ULiège-100	1997	6	29	1997-06-29	2	Blood	AI	25.129	Damona-GIGA-ULiège-690	1991	6	6	1991-06-06	73.5667	6.13056	Sperm	AI	41.1691	Damona-GIGA-ULiège-31	1995	5	20	1995-05-20	25.4333	2.11944	Blood	AI	21.9296	found	1	0	1	0	M-1
Damona-GIGA-ULiège-402	2004	2	17	2004-02-17	2	Blood	IVF	41.1172	Damona-GIGA-ULiège-734	1998	7	9	1998-07-09	68.0333	5.66944	Sperm	AI	21.1128	Damona-GIGA-ULiège-137	2000	1	12	2000-01-12	49.6333	4.13611	Blood	AI	43.9905	found	1	1	0	0	M-2
Damona-GIGA-ULiège-248	2001	12	10	2001-12-10	2	Blood	IVF	25.0698	Damona-GIGA-ULiège-689	1995	5	18	1995-05-18	79.6667	6.63889	Sperm	MOET	29.0302	Damona-GIGA-ULiège-101	1997	8	10	1997-08-10	52.5	4.375	Blood	MOET	27.2648	found	2	1(2)	1(0)	0	M-3, NM-1
Damona-GIGA-ULiège-189	1999	11	13	1999-11-13	2	Blood	IVF	25.6115	Damona-GIGA-ULiège-22	1994	8	1	1994-08-01	64.0667	5.33889	Sperm	AI	41.0512	Damona-GIGA-ULiège-37	1995	11	22	1995-11-22	48.1333	4.01111	Blood	IVF	27.3993	found	1	0	0	1	M-4
Damona-GIGA-ULiège-197	2000	9	30	2000-09-30	2	Blood	IVF	26.3953	Damona-GIGA-ULiège-40	1995	1	19	1995-01-19	69.1	5.75833	Sperm	AI	29.14	Damona-GIGA-ULiège-144	1998	5	2	1998-05-02	29.1333	2.42778	Blood	IVF	27.8699	found	1	1	0	0	M-5
Damona-GIGA-ULiège-554	2007	10	27	2007-10-27	2	Blood	MOET	21.3416	Damona-GIGA-ULiège-268	2001	7	14	2001-07-14	76.2667	6.35556	Sperm	IVF	45.2044	Damona-GIGA-ULiège-434	2005	6	13	2005-06-13	28.6	2.38333	Blood	MOET	26.1175	found	1	0	1	0	NM-10
Damona-GIGA-ULiège-108	1997	12	7	1997-12-07	2	Blood	IVF	23.426	Damona-GIGA-ULiège-728	1991	8	27	1991-08-27	76.2	6.35	Sperm	AI	24.4796	Damona-GIGA-ULiège-38	1995	9	1	1995-09-01	27.3333	2.27778	Blood	MOET	22.9054	found	1	0	1	0	NM-11
Damona-GIGA-ULiège-403	2004	12	28	2004-12-28	2	Blood	AI	27.8493	Damona-GIGA-ULiège-735	1998	1	14	1998-01-14	84.4	7.03333	Sperm	AI	41.5673	Damona-GIGA-ULiège-226	2001	6	20	2001-06-20	42.6333	3.55278	Blood	AI	23.6998	found	1	0	0	1	NM-2
Damona-GIGA-ULiège-311	2002	5	1	2002-05-01	2	Blood	MOET	25.1177	Damona-GIGA-ULiège-52	1995	12	6	1995-12-06	77.6667	6.47222	Sperm	AI	30.5978	Damona-GIGA-ULiège-148	1998	8	26	1998-08-26	44.5333	3.71111	Blood	IVF	26.6546	found	1	0	1	0	NM-4
Damona-GIGA-ULiège-81	1997	2	20	1997-02-20	1	Sperm	IVF	28.915	Damona-GIGA-ULiège-690	1991	6	6	1991-06-06	69.2667	5.77222	Sperm	AI	41.1691	Damona-GIGA-ULiège-29	1994	8	2	1994-08-02	30.8333	2.56944	Blood	AI	24.0724	found	1	0	1	0	NM-5
Damona-GIGA-ULiège-713	2008	12	5	2008-12-05	1	Blood	IVF	29.5827	Damona-GIGA-ULiège-318	2003	5	24	2003-05-24	67.1333	5.59444	Blood	AI	24.4739	Damona-GIGA-ULiège-419	2004	8	6	2004-08-06	52.4667	4.37222	Blood	MOET	30.1554	found	1	0	1	0	NM-6
Damona-GIGA-ULiège-78	1996	6	6	1996-06-06	1	Sperm	IVF	20.5139	Damona-GIGA-ULiège-223	1990	12	22	1990-12-22	66.1667	5.51389	Sperm	AI	23.7566	Damona-GIGA-ULiège-698	1992	10	21	1992-10-21	43.8667	3.65556	Blood	AI	21.9789	found	1	0	1	0	NM-7
Damona-GIGA-ULiège-45	1995	12	5	1995-12-05	1	Sperm	IVF	21.5006	Damona-GIGA-ULiège-502	1989	8	26	1989-08-26	76.1333	6.34444	Sperm	AI	24.9637	Damona-GIGA-ULiège-709	1993	9	28	1993-09-28	26.3333	2.19444	Blood	AI	25.2423	found	1	0(1)	1(0)	0	NM-8
Damona-GIGA-ULiège-520	2006	9	15	2006-09-15	2	Blood	IVF	25.5447	Damona-GIGA-ULiège-738	1999	7	23	1999-07-23	86.7667	7.23056	Sperm	AI	21.7338	Damona-GIGA-ULiège-416	2004	6	11	2004-06-11	27.2667	2.27222	Blood	MOET	40.0969	found	1	0	1	0	NM-9
Damona-GIGA-ULiège-2	2008	12	4	2008-12-04	1	Blood	IVF	29.7199	Damona-GIGA-ULiège-739	2000	1	3	2000-01-03	99.3333	8.27778	Sperm	AI	27.7297	Damona-GIGA-ULiège-405	2004	10	27	2004-10-27	40.7	3.39167	Blood	MOET	20.1429	not_found	0	0	0	0
Damona-GIGA-ULiège-19	1994	9	14	1994-09-14	1	Sperm	AI	21.9431	Damona-GIGA-ULiège-220	1989	1	12	1989-01-12	68.7667	5.73056	Sperm	AI	25.5886	Damona-GIGA-ULiège-696	1992	11	26	1992-11-26	21.6333	1.80278	Blood	AI	23.2838	not_found	0	0	0	0
Damona-GIGA-ULiège-21	1994	9	29	1994-09-29	2	Blood	AI	27.7875	Damona-GIGA-ULiège-220	1989	1	12	1989-01-12	69.2667	5.77222	Sperm	AI	25.5886	Damona-GIGA-ULiège-694	1990	2	18	1990-02-18	55.8667	4.65556	Blood	AI	24.1775	not_found	0	0	0	0
Damona-GIGA-ULiège-25	1995	8	5	1995-08-05	1	Sperm	AI	27.1842	Damona-GIGA-ULiège-502	1989	8	26	1989-08-26	72.0667	6.00556	Sperm	AI	24.9637	Damona-GIGA-ULiège-706	1993	8	25	1993-08-25	23.4	1.95	Blood	AI	24.141	not_found	0	0	0	0
Damona-GIGA-ULiège-28	1996	5	5	1996-05-05	1	Sperm	MOET	26.4238	Damona-GIGA-ULiège-687	1991	2	7	1991-02-07	63.5333	5.29444	Sperm	AI	23.9193	Damona-GIGA-ULiège-707	1994	6	10	1994-06-10	22.9	1.90833	Blood	AI	27.2311	not_found	0	0	0	0
Damona-GIGA-ULiège-30	1995	8	4	1995-08-04	2	Blood	MOET	24.0655	Damona-GIGA-ULiège-502	1989	8	26	1989-08-26	72.0333	6.00278	Sperm	AI	24.9637	Damona-GIGA-ULiège-705	1993	2	8	1993-02-08	29.9667	2.49722	Blood	AI	24.1479	not_found	0	0	0	0
Damona-GIGA-ULiège-35	1994	7	28	1994-07-28	2	Blood	AI	25.3008	Damona-GIGA-ULiège-220	1989	1	12	1989-01-12	67.1667	5.59722	Sperm	AI	25.5886	Damona-GIGA-ULiège-694	1990	2	18	1990-02-18	53.7667	4.48056	Blood	AI	24.1775	not_found	0	0	0	0
Damona-GIGA-ULiège-38	1995	9	1	1995-09-01	2	Blood	MOET	22.9054	Damona-GIGA-ULiège-502	1989	8	26	1989-08-26	72.9667	6.08056	Sperm	AI	24.9637	Damona-GIGA-ULiège-705	1993	2	8	1993-02-08	30.9	2.575	Blood	AI	24.1479	not_found	0	0	0	0
Damona-GIGA-ULiège-40	1995	1	19	1995-01-19	1	Sperm	AI	29.14	Damona-GIGA-ULiège-502	1989	8	26	1989-08-26	65.4667	5.45556	Sperm	AI	24.9637	Damona-GIGA-ULiège-504	1990	9	24	1990-09-24	52.3333	4.36111	Blood	AI	24.9016	not_found	0	0	0	0
Damona-GIGA-ULiège-44	1995	12	5	1995-12-05	1	Sperm	IVF	26.14	Damona-GIGA-ULiège-502	1989	8	26	1989-08-26	76.1333	6.34444	Sperm	AI	24.9637	Damona-GIGA-ULiège-709	1993	9	28	1993-09-28	26.3333	2.19444	Blood	AI	25.2423	not_found	0	0	0	0
Damona-GIGA-ULiège-46	1995	12	25	1995-12-25	2	Blood	MOET	24.3394	Damona-GIGA-ULiège-503	1989	9	27	1989-09-27	75.7333	6.31111	Sperm	AI	43.4329	Damona-GIGA-ULiège-700	1992	6	30	1992-06-30	42.1667	3.51389	Blood	AI	24.3665	not_found	0	0	0	0
Damona-GIGA-ULiège-48	1995	9	30	1995-09-30	2	Blood	AI	24.4327	Damona-GIGA-ULiège-503	1989	9	27	1989-09-27	72.8667	6.07222	Sperm	AI	43.4329	Damona-GIGA-ULiège-709	1993	9	28	1993-09-28	24.1333	2.01111	Blood	AI	25.2423	not_found	0	0	0	0
Damona-GIGA-ULiège-58	1996	2	3	1996-02-03	2	Blood	MOET	25.6218	Damona-GIGA-ULiège-221	1989	11	9	1989-11-09	75.6333	6.30278	Sperm	AI	24.2961	Damona-GIGA-ULiège-700	1992	6	30	1992-06-30	43.5	3.625	Blood	AI	24.3665	not_found	0	0	0	0
Damona-GIGA-ULiège-63	1998	9	12	1998-09-12	2	Blood	IVF	24.9123	Damona-GIGA-ULiège-688	1991	8	28	1991-08-28	85.4667	7.12222	Sperm	AI	26.8926	Damona-GIGA-ULiège-26	1994	11	21	1994-11-21	46.1	3.84167	Blood	AI	25.5236	not_found	0	0	0	0
Damona-GIGA-ULiège-66	1997	7	8	1997-07-08	2	Blood	MOET	28.1229	Damona-GIGA-ULiège-692	1991	7	15	1991-07-15	72.5667	6.04722	Sperm	AI	27.8526	Damona-GIGA-ULiège-712	1995	2	13	1995-02-13	28.9333	2.41111	Blood	AI	25.9336	not_found	0	0	0	0
Damona-GIGA-ULiège-69	1997	2	22	1997-02-22	1	Sperm	IVF	29.4099	Damona-GIGA-ULiège-690	1991	6	6	1991-06-06	69.3333	5.77778	Sperm	AI	41.1691	Damona-GIGA-ULiège-29	1994	8	2	1994-08-02	30.9	2.575	Blood	AI	24.0724	not_found	0	0	0	0
Damona-GIGA-ULiège-70	1997	2	24	1997-02-24	1	Sperm	MOET	28.4154	Damona-GIGA-ULiège-690	1991	6	6	1991-06-06	69.4	5.78333	Sperm	AI	41.1691	Damona-GIGA-ULiège-43	1995	3	24	1995-03-24	23.1667	1.93056	Blood	AI	25.1363	not_found	0	0	0	0
Damona-GIGA-ULiège-80	1997	4	27	1997-04-27	2	Blood	IVF	23.7467	Damona-GIGA-ULiège-692	1991	7	15	1991-07-15	70.1667	5.84722	Sperm	AI	27.8526	Damona-GIGA-ULiège-712	1995	2	13	1995-02-13	26.5333	2.21111	Blood	AI	25.9336	not_found	0	0	0	0
Damona-GIGA-ULiège-86	1996	9	4	1996-09-04	2	Blood	MOET	24.7777	Damona-GIGA-ULiège-23	1994	7	25	1994-07-25	25.4667	2.12222	Sperm	AI	21.7626	Damona-GIGA-ULiège-699	1993	1	14	1993-01-14	44.0333	3.66944	Blood	AI	24.619	not_found	0	0	0	0
Damona-GIGA-ULiège-87	1996	9	7	1996-09-07	2	Blood	MOET	24.4049	Damona-GIGA-ULiège-23	1994	7	25	1994-07-25	25.5667	2.13056	Sperm	AI	21.7626	Damona-GIGA-ULiège-699	1993	1	14	1993-01-14	44.1333	3.67778	Blood	AI	24.619	not_found	0	0	0	0
Damona-GIGA-ULiège-89	1997	1	4	1997-01-04	2	Blood	MOET	37.1167	#N/A	1990	10	24	1990-10-24	75.2	6.26667	Sperm	AI	25.4391	Damona-GIGA-ULiège-705	1993	2	8	1993-02-08	47.2667	3.93889	Blood	AI	24.1479	not_found	0	0	0	0
Damona-GIGA-ULiège-90	1997	1	9	1997-01-09	2	Blood	MOET	24.2311	#N/A	1990	10	24	1990-10-24	75.3667	6.28056	Sperm	AI	25.4391	Damona-GIGA-ULiège-705	1993	2	8	1993-02-08	47.4333	3.95278	Blood	AI	24.1479	not_found	0	0	0	0
Damona-GIGA-ULiège-91	1997	3	22	1997-03-22	2	Blood	MOET	24.148	Damona-GIGA-ULiège-20	1994	12	19	1994-12-19	27.2	2.26667	Sperm	AI	27.4059	Damona-GIGA-ULiège-709	1993	9	28	1993-09-28	42.1	3.50833	Blood	AI	25.2423	not_found	0	0	0	0
Damona-GIGA-ULiège-92	1997	4	7	1997-04-07	2	Blood	MOET	24.8074	Damona-GIGA-ULiège-20	1994	12	19	1994-12-19	27.7333	2.31111	Sperm	AI	27.4059	Damona-GIGA-ULiège-705	1993	2	8	1993-02-08	50.3667	4.19722	Blood	AI	24.1479	not_found	0	0	0	0
Damona-GIGA-ULiège-93	1997	4	18	1997-04-18	2	Blood	MOET	24.3227	Damona-GIGA-ULiège-690	1991	6	6	1991-06-06	71.1667	5.93056	Sperm	AI	41.1691	Damona-GIGA-ULiège-709	1993	9	28	1993-09-28	43	3.58333	Blood	AI	25.2423	not_found	0	0	0	0
Damona-GIGA-ULiège-94	1997	12	21	1997-12-21	2	Blood	IVF	26.6199	Damona-GIGA-ULiège-691	1991	9	13	1991-09-13	76.1	6.34167	Sperm	AI	21.8881	Damona-GIGA-ULiège-30	1995	8	4	1995-08-04	28.7333	2.39444	Blood	MOET	24.0655	not_found	0	0	0	0
Damona-GIGA-ULiège-98	1997	10	24	1997-10-24	2	Blood	IVF	22.8041	Damona-GIGA-ULiège-691	1991	9	13	1991-09-13	74.1667	6.18056	Sperm	AI	21.8881	Damona-GIGA-ULiège-709	1993	9	28	1993-09-28	49.3	4.10833	Blood	AI	25.2423	not_found	0	0	0	0
Damona-GIGA-ULiège-99	1998	1	4	1998-01-04	1	Sperm	AI	21.207	Damona-GIGA-ULiège-728	1991	8	27	1991-08-27	77.1333	6.42778	Sperm	AI	24.4796	Damona-GIGA-ULiège-704	1993	1	20	1993-01-20	60.0667	5.00556	Blood	AI	27.2005	not_found	0	0	0	0
Damona-GIGA-ULiège-101	1997	8	10	1997-08-10	2	Blood	MOET	27.2648	Damona-GIGA-ULiège-39	1995	4	24	1995-04-24	27.7	2.30833	Sperm	AI	24.6655	Damona-GIGA-ULiège-30	1995	8	4	1995-08-04	24.3	2.025	Blood	MOET	24.0655	not_found	0	0	0	0
Damona-GIGA-ULiège-103	1997	6	18	1997-06-18	2	Blood	IVF	24.0465	#N/A	1990	10	24	1990-10-24	80.7	6.725	Sperm	AI	25.4391	Damona-GIGA-ULiège-34	1995	1	3	1995-01-03	29.6333	2.46944	Blood	AI	26.1772	not_found	0	0	0	0
Damona-GIGA-ULiège-120	1997	12	18	1997-12-18	2	Blood	IVF	28.4654	Damona-GIGA-ULiège-691	1991	9	13	1991-09-13	76	6.33333	Sperm	AI	21.8881	Damona-GIGA-ULiège-30	1995	8	4	1995-08-04	28.6333	2.38611	Blood	MOET	24.0655	not_found	0	0	0	0
Damona-GIGA-ULiège-134	1998	10	25	1998-10-25	2	Blood	MOET	26.6562	Damona-GIGA-ULiège-39	1995	4	24	1995-04-24	42.4	3.53333	Sperm	AI	24.6655	Damona-GIGA-ULiège-41	1995	7	16	1995-07-16	39.6333	3.30278	Blood	MOET	28.0533	not_found	0	0	0	0
Damona-GIGA-ULiège-137	2000	1	12	2000-01-12	2	Blood	AI	43.9905	Damona-GIGA-ULiège-708	1994	3	9	1994-03-09	70.9	5.90833	Sperm	AI	34.7587	Damona-GIGA-ULiège-108	1997	12	7	1997-12-07	25.2667	2.10556	Blood	IVF	23.426	not_found	0	0	0	0
Damona-GIGA-ULiège-138	1998	12	10	1998-12-10	2	Blood	MOET	28.4592	Damona-GIGA-ULiège-697	1992	8	11	1992-08-11	76.8	6.4	Sperm	AI	21.1784	Damona-GIGA-ULiège-73	1996	9	21	1996-09-21	26.7333	2.22778	Blood	MOET	23.9574	not_found	0	0	0	0
Damona-GIGA-ULiège-141	1998	6	4	1998-06-04	2	Blood	MOET	26.5174	Damona-GIGA-ULiège-695	1992	9	26	1992-09-26	68.9667	5.74722	Sperm	AI	20.4667	Damona-GIGA-ULiège-27	1994	9	12	1994-09-12	45.1	3.75833	Blood	AI	25.4956	not_found	0	0	0	0
Damona-GIGA-ULiège-142	1998	6	9	1998-06-09	1	Sperm	IVF	26.8899	Damona-GIGA-ULiège-697	1992	8	11	1992-08-11	70.6667	5.88889	Sperm	AI	21.1784	Damona-GIGA-ULiège-711	1994	6	13	1994-06-13	48.3	4.025	Blood	AI	27.1841	not_found	0	0	0	0
Damona-GIGA-ULiège-144	1998	5	2	1998-05-02	2	Blood	IVF	27.8699	Damona-GIGA-ULiège-61	1996	4	4	1996-04-04	25	2.08333	Sperm	AI	34.9472	Damona-GIGA-ULiège-711	1994	6	13	1994-06-13	47.0333	3.91944	Blood	AI	27.1841	not_found	0	0	0	0
Damona-GIGA-ULiège-145	1998	5	4	1998-05-04	2	Blood	MOET	24.6139	Damona-GIGA-ULiège-62	1996	4	4	1996-04-04	25.0667	2.08889	Sperm	AI	21.1669	Damona-GIGA-ULiège-26	1994	11	21	1994-11-21	41.7333	3.47778	Blood	AI	25.5236	not_found	0	0	0	0
Damona-GIGA-ULiège-148	1998	8	26	1998-08-26	2	Blood	IVF	26.6546	Damona-GIGA-ULiège-693	1991	11	4	1991-11-04	82.6333	6.88611	Sperm	AI	27.0939	Damona-GIGA-ULiège-27	1994	9	12	1994-09-12	47.8667	3.98889	Blood	AI	25.4956	not_found	0	0	0	0
Damona-GIGA-ULiège-151	1999	1	1	1999-01-01	1	Sperm	AI	24.872	Damona-GIGA-ULiège-697	1992	8	11	1992-08-11	77.5333	6.46111	Sperm	AI	21.1784	Damona-GIGA-ULiège-32	1994	11	18	1994-11-18	49.9	4.15833	Blood	AI	25.6265	not_found	0	0	0	0
Damona-GIGA-ULiège-160	1999	5	28	1999-05-28	1	Sperm	MOET	24.354	Damona-GIGA-ULiège-85	1996	9	29	1996-09-29	32.1	2.675	Sperm	MOET	24.6036	Damona-GIGA-ULiège-77	1997	2	10	1997-02-10	27.6333	2.30278	Blood	AI	24.2797	not_found	0	0	0	0
Damona-GIGA-ULiège-164	1999	11	8	1999-11-08	2	Blood	IVF	42.7596	Damona-GIGA-ULiège-708	1994	3	9	1994-03-09	68.7333	5.72778	Sperm	AI	34.7587	Damona-GIGA-ULiège-66	1997	7	8	1997-07-08	28.1667	2.34722	Blood	MOET	28.1229	not_found	0	0	0	0
Damona-GIGA-ULiège-174	1999	12	5	1999-12-05	2	Blood	MOET	25.1578	Damona-GIGA-ULiège-702	1993	8	12	1993-08-12	76.6	6.38333	Sperm	AI	26.622	Damona-GIGA-ULiège-103	1997	6	18	1997-06-18	29.7333	2.47778	Blood	IVF	24.0465	not_found	0	0	0	0
Damona-GIGA-ULiège-177	2000	10	21	2000-10-21	2	Blood	IVF	25.7026	Damona-GIGA-ULiège-40	1995	1	19	1995-01-19	69.8	5.81667	Sperm	AI	29.14	Damona-GIGA-ULiège-144	1998	5	2	1998-05-02	29.8333	2.48611	Blood	IVF	27.8699	not_found	0	0	0	0
Damona-GIGA-ULiège-182	2000	4	5	2000-04-05	2	Blood	MOET	22.6499	Damona-GIGA-ULiège-82	1997	2	17	1997-02-17	37.8333	3.15278	Sperm	IVF	18.4358	Damona-GIGA-ULiège-80	1997	4	27	1997-04-27	35.5333	2.96111	Blood	IVF	23.7467	not_found	0	0	0	0
Damona-GIGA-ULiège-190	1999	11	17	1999-11-17	1	Sperm	IVF	24.1149	Damona-GIGA-ULiège-708	1994	3	9	1994-03-09	69.0333	5.75278	Sperm	AI	34.7587	Damona-GIGA-ULiège-53	1995	8	15	1995-08-15	51.5667	4.29722	Blood	MOET	27.476	not_found	0	0	0	0
Damona-GIGA-ULiège-200	2000	3	2	2000-03-02	2	Blood	MOET	26.1905	Damona-GIGA-ULiège-708	1994	3	9	1994-03-09	72.5667	6.04722	Sperm	AI	34.7587	Damona-GIGA-ULiège-30	1995	8	4	1995-08-04	55.4667	4.62222	Blood	MOET	24.0655	not_found	0	0	0	0
Damona-GIGA-ULiège-201	2000	3	2	2000-03-02	1	Sperm	IVF	26.9226	Damona-GIGA-ULiège-33	1994	9	16	1994-09-16	66.2	5.51667	Sperm	AI	25.878	Damona-GIGA-ULiège-37	1995	11	22	1995-11-22	51.8	4.31667	Blood	IVF	27.3993	not_found	0	0	0	0
Damona-GIGA-ULiège-207	2000	4	5	2000-04-05	2	Blood	IVF	22.7509	Damona-GIGA-ULiège-33	1994	9	16	1994-09-16	67.3333	5.61111	Sperm	AI	25.878	Damona-GIGA-ULiège-37	1995	11	22	1995-11-22	52.9333	4.41111	Blood	IVF	27.3993	not_found	0	0	0	0
Damona-GIGA-ULiège-208	2000	8	25	2000-08-25	2	Blood	AI	25.6817	Damona-GIGA-ULiège-708	1994	3	9	1994-03-09	78.4333	6.53611	Sperm	AI	34.7587	Damona-GIGA-ULiège-147	1998	8	5	1998-08-05	24.7667	2.06389	Blood	IVF	23.6838	not_found	0	0	0	0
Damona-GIGA-ULiège-210	2000	12	3	2000-12-03	2	Blood	MOET	24.8496	Damona-GIGA-ULiège-36	1994	11	15	1994-11-15	73.4	6.11667	Sperm	MOET	25.8428	Damona-GIGA-ULiège-143	1998	8	21	1998-08-21	27.5667	2.29722	Blood	MOET	25.2796	not_found	0	0	0	0
Damona-GIGA-ULiège-214	2001	12	10	2001-12-10	2	Blood	MOET	26.9056	Damona-GIGA-ULiège-733	1994	9	1	1994-09-01	88.3	7.35833	Sperm	AI	25.4713	Damona-GIGA-ULiège-91	1997	3	22	1997-03-22	57.2	4.76667	Blood	MOET	24.148	not_found	0	0	0	0
Damona-GIGA-ULiège-217	2002	7	31	2002-07-31	2	Blood	IVF	26.4318	Damona-GIGA-ULiège-67	1997	1	14	1997-01-14	67.2	5.6	Sperm	MOET	23.2817	Damona-GIGA-ULiège-148	1998	8	26	1998-08-26	47.5667	3.96389	Blood	IVF	26.6546	not_found	0	0	0	0
Damona-GIGA-ULiège-225	2001	9	18	2001-09-18	2	Blood	IVF	25.7519	Damona-GIGA-ULiège-732	1994	10	20	1994-10-20	83.9	6.99167	Sperm	AI	20.6139	Damona-GIGA-ULiège-159	1999	4	25	1999-04-25	28.9667	2.41389	Blood	IVF	23.9569	not_found	0	0	0	0
Damona-GIGA-ULiège-235	2001	4	23	2001-04-23	2	Blood	IVF	26.2713	Damona-GIGA-ULiège-36	1994	11	15	1994-11-15	78.1	6.50833	Sperm	MOET	25.8428	Damona-GIGA-ULiège-155	1998	12	27	1998-12-27	28	2.33333	Blood	MOET	26.0289	not_found	0	0	0	0
Damona-GIGA-ULiège-246	2001	3	7	2001-03-07	2	Blood	IVF	27.0022	Damona-GIGA-ULiège-730	1994	8	29	1994-08-29	79.1333	6.59444	Sperm	AI	28.5645	Damona-GIGA-ULiège-103	1997	6	18	1997-06-18	45	3.75	Blood	IVF	24.0465	not_found	0	0	0	0
Damona-GIGA-ULiège-256	2001	7	6	2001-07-06	2	Blood	MOET	25.9205	Damona-GIGA-ULiège-730	1994	8	29	1994-08-29	83.1667	6.93056	Sperm	AI	28.5645	Damona-GIGA-ULiège-93	1997	4	18	1997-04-18	51.0667	4.25556	Blood	MOET	24.3227	not_found	0	0	0	0
Damona-GIGA-ULiège-257	2001	9	2	2001-09-02	2	Blood	MOET	23.7633	Damona-GIGA-ULiège-42	1995	10	22	1995-10-22	71.1333	5.92778	Sperm	AI	25.193	Damona-GIGA-ULiège-93	1997	4	18	1997-04-18	53	4.41667	Blood	MOET	24.3227	not_found	0	0	0	0
Damona-GIGA-ULiège-266	2001	6	13	2001-06-13	2	Blood	IVF	26.3362	Damona-GIGA-ULiège-730	1994	8	29	1994-08-29	82.4	6.86667	Sperm	AI	28.5645	Damona-GIGA-ULiège-103	1997	6	18	1997-06-18	48.2667	4.02222	Blood	IVF	24.0465	not_found	0	0	0	0
Damona-GIGA-ULiège-268	2001	7	14	2001-07-14	1	Sperm	IVF	45.2044	Damona-GIGA-ULiège-730	1994	8	29	1994-08-29	83.4333	6.95278	Sperm	AI	28.5645	Damona-GIGA-ULiège-103	1997	6	18	1997-06-18	49.3	4.10833	Blood	IVF	24.0465	not_found	0	0	0	0
Damona-GIGA-ULiège-276	2001	9	5	2001-09-05	2	Blood	MOET	25.1658	Damona-GIGA-ULiège-42	1995	10	22	1995-10-22	71.2333	5.93611	Sperm	AI	25.193	Damona-GIGA-ULiège-93	1997	4	18	1997-04-18	53.1	4.425	Blood	MOET	24.3227	not_found	0	0	0	0
Damona-GIGA-ULiège-278	2002	1	27	2002-01-27	2	Blood	AI	25.2862	Damona-GIGA-ULiège-703	1996	3	22	1996-03-22	70.9667	5.91389	Sperm	AI	26.459	Damona-GIGA-ULiège-191	1999	12	28	1999-12-28	25.1	2.09167	Blood	MOET	26.5771	not_found	0	0	0	0
Damona-GIGA-ULiège-279	2002	2	23	2002-02-23	2	Blood	AI	27.2312	Damona-GIGA-ULiège-703	1996	3	22	1996-03-22	71.8667	5.98889	Sperm	AI	26.459	Damona-GIGA-ULiège-199	2000	2	16	2000-02-16	24.3333	2.02778	Blood	IVF	21.3658	not_found	0	0	0	0
Damona-GIGA-ULiège-280	2002	5	16	2002-05-16	1	Blood	MOET	20.4448	Damona-GIGA-ULiège-52	1995	12	6	1995-12-06	78.1667	6.51389	Sperm	AI	30.5978	Damona-GIGA-ULiège-84	1998	3	15	1998-03-15	50.5	4.20833	Blood	AI	26.8773	not_found	0	0	0	0
Damona-GIGA-ULiège-306	2002	6	29	2002-06-29	2	Blood	AI	29.7923	Damona-GIGA-ULiège-201	2000	3	2	2000-03-02	28.0333	2.33611	Sperm	IVF	26.9226	Damona-GIGA-ULiège-212	2000	6	30	2000-06-30	24.0333	2.00278	Blood	IVF	25.5352	not_found	0	0	0	0
Damona-GIGA-ULiège-320	2002	9	28	2002-09-28	2	Blood	IVF	25.9677	Damona-GIGA-ULiège-51	1995	10	26	1995-10-26	84.0333	7.00278	Sperm	AI	23.0341	Damona-GIGA-ULiège-212	2000	6	30	2000-06-30	27.0667	2.25556	Blood	IVF	25.5352	not_found	0	0	0	0
Damona-GIGA-ULiège-324	2002	10	9	2002-10-09	2	Blood	AI	22.1379	Damona-GIGA-ULiège-51	1995	10	26	1995-10-26	84.4	7.03333	Sperm	AI	23.0341	Damona-GIGA-ULiège-228	2000	9	25	2000-09-25	24.5333	2.04444	Blood	IVF	24.5463	not_found	0	0	0	0
Damona-GIGA-ULiège-331	2003	8	4	2003-08-04	1	Blood	IVF	27.4287	Damona-GIGA-ULiège-47	1996	1	30	1996-01-30	91.1667	7.59722	Sperm	MOET	23.0526	Damona-GIGA-ULiège-266	2001	6	13	2001-06-13	25.8	2.15	Blood	IVF	26.3362	not_found	0	0	0	0
Damona-GIGA-ULiège-332	2002	11	28	2002-11-28	2	Blood	IVF	27.6269	Damona-GIGA-ULiège-49	1997	8	7	1997-08-07	64.3667	5.36389	Sperm	MOET	25.5038	Damona-GIGA-ULiège-63	1998	9	12	1998-09-12	51	4.25	Blood	IVF	24.9123	not_found	0	0	0	0
Damona-GIGA-ULiège-336	2003	8	17	2003-08-17	1	Blood	IVF	25.8962	Damona-GIGA-ULiège-47	1996	1	30	1996-01-30	91.6	7.63333	Sperm	MOET	23.0526	Damona-GIGA-ULiège-266	2001	6	13	2001-06-13	26.2333	2.18611	Blood	IVF	26.3362	not_found	0	0	0	0
Damona-GIGA-ULiège-342	2003	8	13	2003-08-13	2	Blood	IVF	23.2899	Damona-GIGA-ULiège-70	1997	2	24	1997-02-24	78.4333	6.53611	Sperm	MOET	28.4154	Damona-GIGA-ULiège-228	2000	9	25	2000-09-25	34.8	2.9	Blood	IVF	24.5463	not_found	0	0	0	0
Damona-GIGA-ULiège-346	2003	2	13	2003-02-13	1	Blood	AI	24.1728	Damona-GIGA-ULiège-52	1995	12	6	1995-12-06	87.2667	7.27222	Sperm	AI	30.5978	Damona-GIGA-ULiège-211	2000	12	15	2000-12-15	26.0667	2.17222	Blood	AI	26.3879	not_found	0	0	0	0
Damona-GIGA-ULiège-347	2003	3	21	2003-03-21	2	Blood	MOET	23.3065	Damona-GIGA-ULiège-70	1997	2	24	1997-02-24	73.6	6.13333	Sperm	MOET	28.4154	Damona-GIGA-ULiège-134	1998	10	25	1998-10-25	53.3333	4.44444	Blood	MOET	26.6562	not_found	0	0	0	0
Damona-GIGA-ULiège-362	2003	11	7	2003-11-07	2	Blood	MOET	26.345	Damona-GIGA-ULiège-703	1996	3	22	1996-03-22	92.6	7.71667	Sperm	AI	26.459	Damona-GIGA-ULiège-256	2001	7	6	2001-07-06	28.2	2.35	Blood	MOET	25.9205	not_found	0	0	0	0
Damona-GIGA-ULiège-364	2003	8	12	2003-08-12	2	Blood	MOET	28.1004	Damona-GIGA-ULiège-52	1995	12	6	1995-12-06	93.2667	7.77222	Sperm	AI	30.5978	Damona-GIGA-ULiège-189	1999	11	13	1999-11-13	45.3333	3.77778	Blood	IVF	25.6115	not_found	0	0	0	0
Damona-GIGA-ULiège-370	2003	6	18	2003-06-18	2	Blood	MOET	25.19	Damona-GIGA-ULiège-703	1996	3	22	1996-03-22	87.8667	7.32222	Sperm	AI	26.459	Damona-GIGA-ULiège-153	1999	2	7	1999-02-07	52.8	4.4	Blood	AI	23.6756	not_found	0	0	0	0
Damona-GIGA-ULiège-388	2005	2	27	2005-02-27	2	Blood	AI	28.3637	Damona-GIGA-ULiège-735	1998	1	14	1998-01-14	86.4333	7.20278	Sperm	AI	41.5673	Damona-GIGA-ULiège-118	1998	8	26	1998-08-26	78.9667	6.58056	Blood	AI	30.3256	not_found	0	0	0	0
Damona-GIGA-ULiège-389	2005	3	30	2005-03-30	2	Blood	MOET	34.3404	Damona-GIGA-ULiège-735	1998	1	14	1998-01-14	87.4667	7.28889	Sperm	AI	41.5673	Damona-GIGA-ULiège-118	1998	8	26	1998-08-26	80	6.66667	Blood	AI	30.3256	not_found	0	0	0	0
Damona-GIGA-ULiège-394	2004	6	7	2004-06-07	2	Blood	MOET	24.3521	Damona-GIGA-ULiège-24	1994	1	27	1994-01-27	125.867	10.4889	Sperm	AI	24.1351	Damona-GIGA-ULiège-202	2001	1	26	2001-01-26	40.6667	3.38889	Blood	MOET	26.4507	not_found	0	0	0	0
Damona-GIGA-ULiège-395	2004	6	28	2004-06-28	2	Blood	AI	26.7709	Damona-GIGA-ULiège-127	1998	3	11	1998-03-11	76.4333	6.36944	Sperm	MOET	23.9313	Damona-GIGA-ULiège-306	2002	6	29	2002-06-29	24.0667	2.00556	Blood	AI	29.7923	not_found	0	0	0	0
Damona-GIGA-ULiège-396	2006	1	23	2006-01-23	2	Blood	AI	25.0598	Damona-GIGA-ULiège-739	2000	1	3	2000-01-03	73.4667	6.12222	Sperm	AI	27.7297	Damona-GIGA-ULiège-304	2002	5	1	2002-05-01	45.1667	3.76389	Blood	AI	25.5815	not_found	0	0	0	0
Damona-GIGA-ULiège-410	2004	10	9	2004-10-09	2	Blood	IVF	27.2166	Damona-GIGA-ULiège-734	1998	7	9	1998-07-09	75.8667	6.32222	Sperm	AI	21.1128	Damona-GIGA-ULiège-279	2002	2	23	2002-02-23	31.7	2.64167	Blood	AI	27.2312	not_found	0	0	0	0
Damona-GIGA-ULiège-416	2004	6	11	2004-06-11	2	Blood	MOET	40.0969	Damona-GIGA-ULiège-736	1997	6	26	1997-06-26	84.4667	7.03889	Sperm	AI	17.6779	Damona-GIGA-ULiège-210	2000	12	3	2000-12-03	42.6	3.55	Blood	MOET	24.8496	not_found	0	0	0	0
Damona-GIGA-ULiège-418	2004	7	5	2004-07-05	2	Blood	MOET	28.4909	Damona-GIGA-ULiège-24	1994	1	27	1994-01-27	126.8	10.5667	Sperm	AI	24.1351	Damona-GIGA-ULiège-202	2001	1	26	2001-01-26	41.6	3.46667	Blood	MOET	26.4507	not_found	0	0	0	0
Damona-GIGA-ULiège-419	2004	8	6	2004-08-06	2	Blood	MOET	30.1554	Damona-GIGA-ULiège-736	1997	6	26	1997-06-26	86.3333	7.19444	Sperm	AI	17.6779	Damona-GIGA-ULiège-210	2000	12	3	2000-12-03	44.4667	3.70556	Blood	MOET	24.8496	not_found	0	0	0	0
Damona-GIGA-ULiège-420	2004	9	11	2004-09-11	1	Blood	AI	48.0752	Damona-GIGA-ULiège-95	1997	6	11	1997-06-11	88.0333	7.33611	Sperm	MOET	24.6596	Damona-GIGA-ULiège-311	2002	5	1	2002-05-01	28.5333	2.37778	Blood	MOET	25.1177	not_found	0	0	0	0
Damona-GIGA-ULiège-429	2004	11	24	2004-11-24	2	Blood	AI	27.2285	Damona-GIGA-ULiège-735	1998	1	14	1998-01-14	83.2667	6.93889	Sperm	AI	41.5673	Damona-GIGA-ULiège-149	1999	8	13	1999-08-13	64.0667	5.33889	Blood	AI	25.8264	not_found	0	0	0	0
Damona-GIGA-ULiège-431	2004	10	25	2004-10-25	2	Blood	MOET	24.3461	Damona-GIGA-ULiège-95	1997	6	11	1997-06-11	89.5	7.45833	Sperm	MOET	24.6596	Damona-GIGA-ULiège-311	2002	5	1	2002-05-01	30	2.5	Blood	MOET	25.1177	not_found	0	0	0	0
Damona-GIGA-ULiège-434	2005	6	13	2005-06-13	2	Blood	MOET	26.1175	Damona-GIGA-ULiège-735	1998	1	14	1998-01-14	89.9667	7.49722	Sperm	AI	41.5673	Damona-GIGA-ULiège-258	2001	3	22	2001-03-22	51.2	4.26667	Blood	MOET	24.5444	not_found	0	0	0	0
Damona-GIGA-ULiège-437	2005	11	7	2005-11-07	2	Blood	MOET	26.2125	Damona-GIGA-ULiège-201	2000	3	2	2000-03-02	68.9333	5.74444	Sperm	IVF	26.9226	Damona-GIGA-ULiège-258	2001	3	22	2001-03-22	56.1	4.675	Blood	MOET	24.5444	not_found	0	0	0	0
Damona-GIGA-ULiège-449	2005	4	21	2005-04-21	2	Blood	AI	24.3924	Damona-GIGA-ULiège-16	1998	9	23	1998-09-23	79.8	6.65	Sperm	AI	22.4853	Damona-GIGA-ULiège-171	2000	7	12	2000-07-12	57.8667	4.82222	Blood	AI	27.1476	not_found	0	0	0	0
Damona-GIGA-ULiège-481	2005	9	15	2005-09-15	2	Blood	IVF	22.3234	Damona-GIGA-ULiège-738	1999	7	23	1999-07-23	74.6	6.21667	Sperm	AI	21.7338	Damona-GIGA-ULiège-256	2001	7	6	2001-07-06	50.8	4.23333	Blood	MOET	25.9205	not_found	0	0	0	0
Damona-GIGA-ULiège-486	2006	1	19	2006-01-19	2	Blood	AI	24.5767	Damona-GIGA-ULiège-739	2000	1	3	2000-01-03	73.3333	6.11111	Sperm	AI	27.7297	Damona-GIGA-ULiège-304	2002	5	1	2002-05-01	45.0333	3.75278	Blood	AI	25.5815	not_found	0	0	0	0
Damona-GIGA-ULiège-488	2006	6	4	2006-06-04	1	Blood	MOET	28.4203	Damona-GIGA-ULiège-201	2000	3	2	2000-03-02	75.9	6.325	Sperm	IVF	26.9226	Damona-GIGA-ULiège-416	2004	6	11	2004-06-11	23.8333	1.98611	Blood	MOET	40.0969	not_found	0	0	0	0
Damona-GIGA-ULiège-515	2006	10	2	2006-10-02	2	Blood	MOET	21.4319	Damona-GIGA-ULiège-731	1998	11	11	1998-11-11	95.8	7.98333	Sperm	AI	23.5592	Damona-GIGA-ULiège-397	2004	1	13	2004-01-13	32.8333	2.73611	Blood	MOET	22.2404	not_found	0	0	0	0
Damona-GIGA-ULiège-536	2007	9	7	2007-09-07	2	Blood	AI	40.2894	Damona-GIGA-ULiège-268	2001	7	14	2001-07-14	74.6	6.21667	Sperm	IVF	45.2044	Damona-GIGA-ULiège-378	2004	6	21	2004-06-21	38.8333	3.23611	Blood	AI	23.711	not_found	0	0	0	0
Damona-GIGA-ULiège-541	2007	8	6	2007-08-06	1	Blood	AI	23.9503	Damona-GIGA-ULiège-740	2001	1	17	2001-01-17	79.4667	6.62222	Sperm	AI	24.346	Damona-GIGA-ULiège-446	2005	3	13	2005-03-13	28.9333	2.41111	Blood	AI	20.3084	not_found	0	0	0	0
Damona-GIGA-ULiège-568	2008	9	9	2008-09-09	2	Blood	IVF	28.3733	Damona-GIGA-ULiège-739	2000	1	3	2000-01-03	105.467	8.78889	Sperm	AI	27.7297	Damona-GIGA-ULiège-422	2005	4	20	2005-04-20	41	3.41667	Blood	AI	29.9194	not_found	0	0	0	0
Damona-GIGA-ULiège-571	2008	6	4	2008-06-04	1	Blood	AI	25.0414	Damona-GIGA-ULiège-739	2000	1	3	2000-01-03	102.233	8.51944	Sperm	AI	27.7297	Damona-GIGA-ULiège-408	2004	4	13	2004-04-13	50.1667	4.18056	Blood	AI	21.0696	not_found	0	0	0	0
Damona-GIGA-ULiège-578	2008	6	24	2008-06-24	1	Blood	IVF	18.0388	Damona-GIGA-ULiège-739	2000	1	3	2000-01-03	102.9	8.575	Sperm	AI	27.7297	Damona-GIGA-ULiège-405	2004	10	27	2004-10-27	44.2667	3.68889	Blood	MOET	20.1429	not_found	0	0	0	0
Damona-GIGA-ULiège-581	2008	6	30	2008-06-30	1	Blood	IVF	23.4962	Damona-GIGA-ULiège-736	1997	6	26	1997-06-26	133.8	11.15	Sperm	AI	17.6779	Damona-GIGA-ULiège-405	2004	10	27	2004-10-27	44.4667	3.70556	Blood	MOET	20.1429	not_found	0	0	0	0
Damona-GIGA-ULiège-584	2008	8	29	2008-08-29	1	Blood	AI	26.6809	Damona-GIGA-ULiège-736	1997	6	26	1997-06-26	135.8	11.3167	Sperm	AI	17.6779	Damona-GIGA-ULiège-500	2006	8	27	2006-08-27	24.1667	2.01389	Blood	AI	24.113	not_found	0	0	0	0
Damona-GIGA-ULiège-593	2008	9	8	2008-09-08	1	Blood	MOET	27.0723	Damona-GIGA-ULiège-736	1997	6	26	1997-06-26	136.133	11.3444	Sperm	AI	17.6779	Damona-GIGA-ULiège-219	2003	10	6	2003-10-06	59.7	4.975	Blood	MOET	26.0949	not_found	0	0	0	0
Damona-GIGA-ULiège-595	2008	7	31	2008-07-31	1	Blood	AI	22.0773	Damona-GIGA-ULiège-739	2000	1	3	2000-01-03	104.133	8.67778	Sperm	AI	27.7297	Damona-GIGA-ULiège-384	2004	6	1	2004-06-01	50.4333	4.20278	Blood	AI	25.8161	not_found	0	0	0	0
Damona-GIGA-ULiège-596	2008	11	18	2008-11-18	1	Blood	AI	20.3966	Damona-GIGA-ULiège-318	2003	5	24	2003-05-24	66.5667	5.54722	Blood	AI	24.4739	Damona-GIGA-ULiège-411	2004	8	6	2004-08-06	51.9	4.325	Blood	AI	23.0748	not_found	0	0	0	0
Damona-GIGA-ULiège-599	2009	3	20	2009-03-20	1	Blood	IVF	25.3124	Damona-GIGA-ULiège-739	2000	1	3	2000-01-03	111.867	9.32222	Sperm	AI	27.7297	Damona-GIGA-ULiège-520	2006	9	15	2006-09-15	30.3	2.525	Blood	IVF	25.5447	not_found	0	0	0	0
Damona-GIGA-ULiège-616	2010	4	3	2010-04-03	1	Blood	AI	24.4835	Damona-GIGA-ULiège-488	2006	6	4	2006-06-04	46.3667	3.86389	Blood	MOET	28.4203	Damona-GIGA-ULiège-508	2006	10	16	2006-10-16	41.9	3.49167	Blood	AI	23.2156	not_found	0	0	0	0
Damona-GIGA-ULiège-634	2010	3	15	2010-03-15	1	Blood	MOET	23.1994	Damona-GIGA-ULiège-253	2001	11	2	2001-11-02	101.567	8.46389	Sperm	AI	23.5266	Damona-GIGA-ULiège-536	2007	9	7	2007-09-07	30.4	2.53333	Blood	AI	40.2894	not_found	0	0	0	0
Damona-GIGA-ULiège-680	2010	9	6	2010-09-06	1	Blood	AI	25.7406	Damona-GIGA-ULiège-420	2004	9	11	2004-09-11	72.6	6.05	Blood	AI	48.0752	Damona-GIGA-ULiège-435	2005	9	26	2005-09-26	59.9333	4.99444	Blood	AI	26.1339	not_found	0	0	0	0
Damona-GIGA-ULiège-710	1993	7	3	1993-07-03	1	Sperm	AI	20.8955	Damona-GIGA-ULiège-222	1990	8	5	1990-08-05	35.1667	2.93056	Sperm	AI	22.9663	Damona-GIGA-ULiège-224	1991	1	28	1991-01-28	29.3	2.44167	Blood	AI	21.5708	not_found	0	0	0	0

## Sheet: ST3
Supplementary Table 3. Quantification of allelic dosage of dnPM in offspring and grand-offspring
dnSV	Paired dnPM	Offspring			Grand-offspring
		Wild-type allele supporting reads [◊]	DNM allele supporting reads [◊]	Allelic dosage	Wild-type allele supporting reads [ǂ]	DNM allele supporting reads [ǂ]	Allelic dosage
NM-1	22-bp deletion	28	6	0.176	0 [*]	0 [*]	n.a. [*]
NM-8	A>T substitution	12	3	0.2	4	2	0.333
NM-9 [⁺]	11-bp insertion	14(52)	7(33)	0.377	14(35)	13(18)	0.388
A-2 [⁺]	G>A substitution	17(402)	3(121)	0.228	14(163)	11(125)	0.482
					3(0) [#]	2(0) [#]
					4(327) [##]	3(250) [##]
M-3 [⁺]	1-bp deletion	22(67)	8(29)	0.294	4(21)	3(21)	0.5
					3(31)	2(33)
M-5 [⁺][⁺⁺]	8-bp deletion	34	9	0.209	10(19)	10(14)	0.453
[◊] The read counts for wild-type and mutated alleles obtained from the offspring NGS data. Of the six dnPM, four were validated in Allegro targeted genotyping-by-sequencing experiment (NM-9, A-2, M-3, and M-5, marked with [⁺]). Read counts obtained from the Allegro targeted genotyping-by-sequencing experiment is shown in the bracket behind the read count from the massively parallel sequencing da…
